# Supplementary material
Source: HighWire-hosted journal article supplement (https://tobaccocontrol.bmj.com/content/30/e2/e96)
Supplement: inline-supplementary-material-1 [file inline-supplementary-material-1.pdf]

## Supplemental material for “Evaluating How Licensing-Law Strategies Will Impact Disparities in Tobacco Retailer Density: A Simulation in Ohio”

Peter F. Craigmile<sup>1</sup>, Nathaniel Onnen<sup>1</sup>, Elli Schwartz<sup>2</sup>, Allison M. Glasser<sup>2</sup>,  
Megan E. Roberts<sup>2</sup>.

<sup>1</sup> Department of Statistics, The Ohio State University, Columbus, OH, USA

<sup>2</sup> College of Public Health, The Ohio State University, Columbus, OH, USA

*Last updated June 8, 2020*

We provide more detail on how we account for the multivariate spatial dependence in the pre- and post-policy counts as we investigate different questions about the equality impact.

Suppose that there are  $m$  census tracts, and let  $Y_{1i}$  denote the number of establishments in census tract  $i = 1, \dots, m$  before a policy is made – we call  $\mathbf{Y}_1 = (Y_{11}, \dots, Y_{1m})^T$  the **pre-policy counts**. After we enact a policy, let  $Y_{2i}$  denote the number of establishments in census tract  $i$  – we call  $\mathbf{Y}_2 = (Y_{21}, \dots, Y_{2m})^T$  the **post-policy counts**. For each census tract let  $P_i$  denote the population (in thousands) for tract  $i$ . We assume that in each tract the population is unchanged pre- and post- policy.

### Investigating the absence of disparities

To investigate whether the establishment densities are different for low and high values of a dichotomous covariate pre- and post-policy we consider the following.

Let  $d_i$  denote the value of covariate in census tract  $i$ , with  $d_i = 0$  at the low level and  $d_i = 1$  at the high level. Taking a log transformations of the pre- and post-policy establishment

rates, let

$$Z_{ki} = \log((Y_{ki} + 1)/P_i), \quad k = 1, 2, \quad i = 1, \dots, m$$

(We add 1 to guard against taking the log of zero). With this transformation, a joint normal distribution is reasonable for  $\{Z_{ki} : k = 1, 2, \quad i = 1, \dots, m\}$ .

In terms of the covariate  $d_i$ , we assume that the mean of the pre-policy log establishment rates in tract  $i$  is

$$E(Z_{1i}) = \gamma_1 + \gamma_2 d_i, \quad i = 1, \dots, m. \quad (1)$$

The mean of the post-policy log establishment rates in tract  $i$  can be different with

$$E(Z_{2i}) = \gamma_3 + \gamma_4 d_i, \quad i = 1, \dots, m. \quad (2)$$

In these two models for the mean,  $\gamma_2$  measures the effect of the disparity for the pre-policy log establishment rates and  $\gamma_4$  measures the effect of the disparity for the post-policy log establishment rates. Thus to compare the disparities post-policy minus pre-policy we need to estimate  $\gamma_4 - \gamma_2$ . The least squares estimate of  $\gamma_2$  is

$$\hat{\gamma}_2 = \text{average}\{Z_{1i} : d_i = 1\} - \text{average}\{Z_{1i} : d_i = 0\},$$

and the least squares estimate of  $\gamma_4$  is

$$\hat{\gamma}_4 = \text{average}\{Z_{2i} : d_i = 1\} - \text{average}\{Z_{2i} : d_i = 0\},$$

which means that our estimate of  $\gamma_4 - \gamma_2$  is  $\hat{\gamma}_4 - \hat{\gamma}_2$ . (For completeness the least squares estimate of  $\gamma_1$  is

$$\hat{\gamma}_1 = \text{average}\{Z_{1i} : d_i = 0\}$$

and the least squares estimate of  $\gamma_3$  is

$$\hat{\gamma}_3 = \text{average}\{Z_{2i} : d_i = 0\}.$$

This will be used in the next section.)

To calculate the standard error for  $\hat{\gamma}_4 - \hat{\gamma}_2$ , we need to assume a joint distribution for our log transformed data. We assume a separable bivariate conditional autoregressive (CAR) model (e.g., Banerjee et al., 2014, Section 7.4) for the counts using vector-matrix notation. Let  $\mathbf{Z}_1 = (Z_{1i})^T$  denote the vector of pre-policy log establishment rates and  $\mathbf{Z}_2 = (Z_{2i})^T$  denote the vector of post-policy log establishment rates. We then specify a  $m \times m$  spatial proximity matrix  $\mathbf{W}$  as follows: the  $(i, j)$  element of  $\mathbf{W}$  is equal to 1 if census tract  $j$  is a neighbor of tract  $i$ , and zero otherwise (we assume each tract cannot be a neighbor of themselves). Next, let  $\mathbf{C}$  denote a diagonal  $m \times m$  matrix, where the  $i$ th diagonal element is equal to the number of neighbors that census tract  $i$  has. Then we assume

$$\begin{pmatrix} \mathbf{Z}_1 \\ \mathbf{Z}_2 \end{pmatrix} \sim N_{2m}(\mathbf{D}\boldsymbol{\gamma}, \boldsymbol{\Sigma})$$

where the covariance matrix is

$$\boldsymbol{\Sigma} = \begin{bmatrix} \tau_1^2(\mathbf{C} - \delta\mathbf{W})^{-1} & \rho\tau_1\tau_2(\mathbf{C} - \delta\mathbf{W})^{-1} \\ \rho\tau_1\tau_2(\mathbf{C} - \delta\mathbf{W})^{-1} & \tau_2^2(\mathbf{C} - \delta\mathbf{W})^{-1} \end{bmatrix}.$$

Our parameter vector that appears in the mean is  $\boldsymbol{\gamma} = (\gamma_1, \gamma_2, \gamma_3, \gamma_4)^T$  and the design matrix is

$$\mathbf{D} = \begin{bmatrix} \mathbf{1}_m & \mathbf{x} & \mathbf{0}_m & \mathbf{0}_m \\ \mathbf{0}_m & \mathbf{0}_m & \mathbf{1}_m & \mathbf{x} \end{bmatrix},$$

where  $\mathbf{0}_m$  is a vector of  $m$  zeros,  $\mathbf{1}_m$  is a vector of  $m$  ones, and  $\mathbf{x} = (x_1, \dots, x_m)^T$  is the covariate vector.

In the covariance matrix  $\boldsymbol{\Sigma}$ , the parameter  $-1 < \delta < 1$  is known as the *spatial dependence parameter* and in this model measures the spatial dependence in neighboring census tracts both within and between the pre- and post-policy counts. The parameter  $-1 < \rho < 1$  is a correlation parameter,  $\tau_1^2 > 0$  is a variance parameter for the pre-policy log establishment rates, and  $\tau_2^2 > 0$  is a variance parameter for the post-policy log establishment rates.

Then the standard error for  $\hat{\gamma}_4 - \hat{\gamma}_2$  is

$$\sqrt{\mathbf{a}^T (\mathbf{D}^T \mathbf{D})^{-1} (\mathbf{D}^T \boldsymbol{\Sigma} \mathbf{D}) (\mathbf{D}^T \mathbf{D})^{-1} \mathbf{a}},$$

where  $\mathbf{a} = (0, -1, 0, 1)^T$ . In practice we use an estimate of  $\boldsymbol{\Sigma}$  calculated with maximum likelihood estimates of  $\delta$ ,  $\tau_1^2$ ,  $\tau_2^2$  and  $\rho$  based on the residuals, calculated using the least squares estimates of  $\boldsymbol{\gamma}$ .

### Investigating the percentage reduction

From (1) and (2) the mean log establishment rate at the low level of the covariate pre-policy (i.e., when  $d_i = 0$ ) is  $\gamma_1$  and at the low level of the covariate post-policy is  $\gamma_3$ . Thus the percentage reduction in the log establishment rate at low level of the covariate can be defined to be

$$\left( \frac{\gamma_1 - \gamma_3}{\gamma_1} \right) \times 100\% = \left( 1 - \frac{\gamma_3}{\gamma_1} \right) \times 100\%.$$

Similarly from (1) and (2), the percentage reduction in the log establishment rate at high level of the covariate (i.e., when  $d_i = 1$ ) can be defined to be

$$\left( \frac{[\gamma_1 + \gamma_2] - [\gamma_3 + \gamma_4]}{[\gamma_1 + \gamma_2]} \right) \times 100\% = \left( 1 - \frac{[\gamma_3 + \gamma_4]}{[\gamma_1 + \gamma_2]} \right) \times 100\%.$$

We convert to the original scale instead, noting first that on the log scale that the mean log rate is equal to the median log rate. Taking exponentials, we have that  $\exp(\text{median log rate})$  is the median rate on the original scale. Thus, to calculate the percentage reduction in the establishment rate at the low level of the covariate is

$$\text{PR}_0 = \left( 1 - \frac{\exp(\gamma_3)}{\exp(\gamma_1)} \right) \times 100\%,$$

and at the high level of the covariate is

$$\text{PR}_1 = \left( 1 - \frac{\exp(\gamma_3 + \gamma_4)}{\exp(\gamma_1 + \gamma_2)} \right) \times 100\%.$$

We estimate these quantities from the data using the least squares estimates of  $\gamma_1$ ,  $\gamma_2$ ,  $\gamma_3$ , and  $\gamma_4$  defined in the previous section. Then using the delta method (e.g., [Casella and Berger, 2002](#), p.240), the standard error for our estimator of

$$PR_1 - PR_0 = 100 \left( \frac{\exp(\gamma_3)}{\exp(\gamma_1)} - \frac{\exp(\gamma_3 + \gamma_4)}{\exp(\gamma_1 + \gamma_2)} \right)$$

is

$$\sqrt{\mathbf{b}^T (\mathbf{D}^T \mathbf{D})^{-1} (\mathbf{D}^T \boldsymbol{\Sigma} \mathbf{D}) (\mathbf{D}^T \mathbf{D})^{-1} \mathbf{b}}$$

where

$$\mathbf{b} = 100 \left( -\frac{\exp(\gamma_3)}{\exp(\gamma_1)} + \frac{\exp(\gamma_3 + \gamma_4)}{\exp(\gamma_1 + \gamma_2)}, \frac{\exp(\gamma_3 + \gamma_4)}{\exp(\gamma_1 + \gamma_2)}, \frac{\exp(\gamma_3)}{\exp(\gamma_1)} - \frac{\exp(\gamma_3 + \gamma_4)}{\exp(\gamma_1 + \gamma_2)}, -\frac{\exp(\gamma_3 + \gamma_4)}{\exp(\gamma_1 + \gamma_2)} \right)^T.$$

## Investigating weakened associations

To investigate the difference between associations pre- and post-policy, we consider two marginal models for the post and pre-counts.

As with the [Adibe et al. \(2019\)](#) we fit a negative binomial model to the pre-policy counts, assuming a working covariance of independence between the counts. We also fit a negative binomial model to the post-policy counts, making the same working independence covariance assumption. Again we use a sandwich estimator to correct the covariance of the model coefficient estimator, but now account for cross-dependence between the spatial counts pre- and post-policy.

In the negative binomial model for the pre-counts we assume  $E(Y_{1i}) = \mu_{1i}$ , where for a set of covariates of length  $p$ ,  $\mathbf{x}_{1i}$  and coefficients  $\boldsymbol{\beta}_1$ ,

$$\eta_{1i} = \log(\mu_{1i}) = \log(P_i) + \mathbf{x}_{1i}^T \boldsymbol{\beta}_1.$$

Similarly for the post-counts we assume  $E(Y_{2i}) = \mu_{2i}$  with

$$\eta_{2i} = \log(\mu_{2i}) = \log(P_i) + \mathbf{x}_{2i}^T \boldsymbol{\beta}_2.$$

Allowing for potentially different over-dispersion in the pre- and post-policy counts our model for the variance is

$$\text{var}(Y_{ki}) = V_k(\mu_{ki}) = \mu_{ki} + \frac{\mu_{ki}^2}{\theta_k},$$

where  $\theta_k > 0$  are the pre- ( $k = 1$ ) and post-policy ( $k = 2$ ) dispersion parameters. To account for the spatial dependence for the pre- and post-policy counts over the census tracts we assume for  $k = 1, 2$ ,  $k' = 1, 2$ ,  $i = 1, \dots, m$ , and  $j = 1, \dots, m$ ,

$$\text{cov}(Y_{ki}, Y_{k'j}) = \begin{cases} \sqrt{V_k(\mu_{ki})V_{k'}(\mu_{k'j})} \rho_{ij}, & k = k'; \\ \sqrt{V_k(\mu_{ki})V_{k'}(\mu_{k'j})} \lambda \rho_{ij}, & k \neq k', \end{cases}$$

where  $\rho_{ij}$  parameterizes the correlation in the counts between tracts  $i$  and  $j$ . Our model for  $\rho_{ij}$  is the same as for [Adibe et al. \(2019\)](#). We estimate the parameter spatial dependence parameter that appears in the model for  $\rho_{ij}$  and the correlation parameter  $-1 < \lambda < 1$  using maximum likelihood estimation based on the Pearson residuals calculated from both the pre- and post-policy counts.

For  $k = 1, 2$ , let  $\mathbf{X}_k$  denote an  $m \times p$  design matrix with  $i$ th row  $\mathbf{x}_{ki}$  and let  $\mathbf{V}_k$  denote a diagonal matrix with  $(i, i)$  element  $V_k(\mu_{ki})$ . Let  $\mathbf{G}_k$  be an  $m \times p$  matrix with  $(i, j)$  element

$$[\mathbf{G}_k]_{ij} = \frac{\partial \mu_{ki}}{\partial \beta_j} = \frac{\partial \mu_{ki}}{\partial \eta_{ki}} \frac{\partial \eta_{ki}}{\partial \beta_j} = \mu_{ki} [x_{ki}]_j,$$

since

$$\frac{\partial \mu_{ki}}{\partial \eta_{ki}} = \left[ \frac{\partial \eta_{ki}}{\partial \mu_{ki}} \right]^{-1} = \left[ \frac{\partial \log(\mu_{ki})}{\partial \mu_{ki}} \right]^{-1} = \mu_{ki}.$$

Then the sandwich estimator of the covariance of  $\hat{\boldsymbol{\beta}}_k$  is

$$\text{cov}(\hat{\boldsymbol{\beta}}_k) = (\mathbf{G}_k^T \mathbf{V}_k^{-1} \mathbf{G}_k)^{-1} \mathbf{G}_k^T \mathbf{V}_k^{-1} \text{cov}(\mathbf{Y}_k) \mathbf{V}_k^{-1} \mathbf{G}_k (\mathbf{G}_k^T \mathbf{V}_k^{-1} \mathbf{G}_k)^{-1}, \quad k = 1, 2,$$

with cross-covariance

$$\text{cov}(\hat{\boldsymbol{\beta}}_1, \hat{\boldsymbol{\beta}}_2) = (\mathbf{G}_1^T \mathbf{V}_1^{-1} \mathbf{G}_1)^{-1} \mathbf{G}_1^T \mathbf{V}_1^{-1} \text{cov}(\mathbf{Y}_1, \mathbf{Y}_2) \mathbf{V}_2^{-1} \mathbf{G}_2 (\mathbf{G}_2^T \mathbf{V}_2^{-1} \mathbf{G}_2)^{-1}.$$

Then our sandwich estimator of the covariance of the estimated model coefficients can be written as

$$\widehat{\text{cov}}(\widehat{\boldsymbol{\beta}}_k) = \mathbf{J}_k^{-1} \mathbf{B}_k^T (\mathbf{C} - \widehat{\alpha} \mathbf{W}) \mathbf{B}_k \mathbf{J}_k^{-1}, \quad k = 1, 2,$$

with

$$\widehat{\text{cov}}(\widehat{\boldsymbol{\beta}}_1, \widehat{\boldsymbol{\beta}}_2) = \lambda \mathbf{J}_1^{-1} \mathbf{B}_1^T (\mathbf{C} - \widehat{\alpha} \mathbf{W}) \mathbf{B}_2 \mathbf{J}_2^{-1},$$

where here  $\mathbf{J}_k = \mathbf{G}_k^T \mathbf{V}_k^{-1} \mathbf{G}_k$  and  $\mathbf{B}_k = \text{diag}(\widehat{\mu}_{ki} / \sqrt{V_k(\widehat{\mu}_{ki})}) \mathbf{X}$ .

## References

- Adibe, C., Craigmile, P. F., Onnen, N., Schwartz, E., and Roberts, M. E. (2019). The relationship between tobacco retailer density and neighborhood demographics in Ohio. *Ohio Journal of Public Health*, 4.
- Banerjee, S., Carlin, B. P., and Gelfand, A. E. (2014). *Hierarchical Modeling and Analysis for Spatial Data*. Chapman and Hall/CRC, Boca Raton, FL.
- Casella, G. and Berger, R. L. (2002). *Statistical Inference, Second Edition*. Duxbury, Pacific Grove, CA.
